# Supplementary material for: Ablation of Sphingosine Kinase 1 Protects Cornea from Neovascularization in a Mouse Corneal Injury Model
Source: MDPI journal article supplement (doi:10.3390/cells11182914), 2022-09-17
Supplement: s1 [file s1]

*Supplementary Materials*

# Ablation of Sphingosine kinase 1 protects cornea from neovascularization in a mouse corneal injury model

Joseph L. Wilkerson <sup>1,2,†</sup>, Sandip K. Basu <sup>3,†</sup>, Megan A. Stiles <sup>1</sup>, Amanda Prislovsky <sup>3</sup>, Richard C. Gramberg <sup>3</sup>, Sarah E. Nicholas <sup>4,5</sup>, Dimitrios Karamichos <sup>4,5,6</sup>, Jeremy C. Allegood <sup>7</sup>, Richard L. Proia <sup>8</sup> and Nawajes Mandal <sup>1,3,9,10,\*</sup>

<sup>1</sup> Dean A. McGee Eye Institute, University of Oklahoma Health Sciences Center, Oklahoma City, OK 73104, USA; joseph.wilkerson@hsc.utah.edu (J.L.W.); Megan-Stiles@ouhsc.edu (M.A.S.)

<sup>2</sup> Department of Nutrition and Integrative Physiology, University of Utah, Salt Lake City, UT 84112, USA;

<sup>3</sup> Department of Ophthalmology, University of Tennessee Health Sciences Center, Hamilton Eye Institute, Memphis, TN 38163, USA; sbasu8@uthsc.edu (S.K.B.); aprislo1@uthsc.edu (A.P.); rgramber@uthsc.edu (R.C.G.);

<sup>4</sup> North Texas Eye Research Institute, University of North Texas Health Science Center, Fort Worth, TX 76107, USA; sarah.nicholas@unthsc.edu (S.E.N.); dimitrios.karamichos@unthsc.edu (D.K.)

<sup>5</sup> Department of Pharmaceutical Sciences, University of North Texas Health Science Center, Fort Worth, TX 76107, USA;

<sup>6</sup> Department of Pharmacology and Neuroscience, University of North Texas Health Science Center, Fort Worth, TX 76107, USA;

<sup>7</sup> Department of Biochemistry and Molecular Biology, Virginia Commonwealth University School of Medicine, Richmond, VA 23298, USA; jeremy.allegood@vcuhealth.org

<sup>8</sup> Genetics of Development and Disease Branch, National Institute of Diabetes and Digestive and Kidney Diseases, National Institutes of Health, Bethesda, MD 20892, USA; richard.proia@nih.gov

<sup>9</sup> Departments of Anatomy and Neurobiology, and Pharmaceutical Sciences, University of Tennessee Health Sciences Center, Memphis, TN 38163, USA

<sup>10</sup> Memphis VA Medical Center, Memphis, TN 38104, USA

\* Correspondence: nmandal@uthsc.edu

† These authors contributed equally to this work.

## Supplementary Figure S1

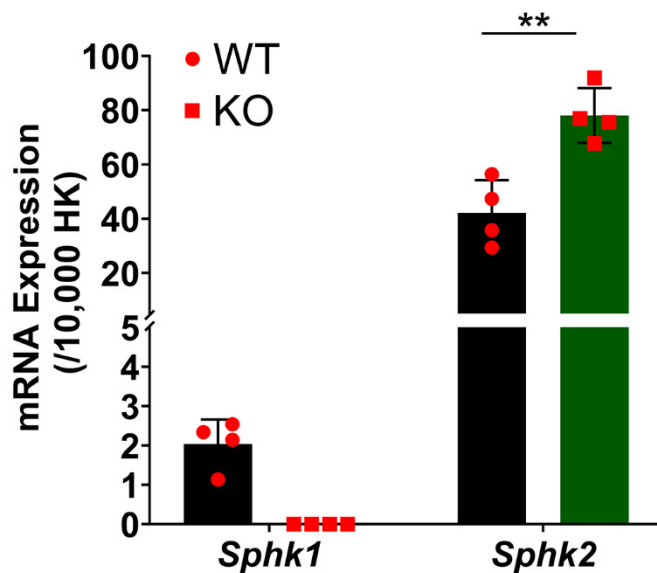

**Figure S1.** Gene expression of *Sphk1* and *Sphk2* in WT and *Sphk1*<sup>-/-</sup> mice cornea. Expression level of *Sphk1* mRNA is undetectable in *Sphk1*<sup>-/-</sup> mice cornea. The expression level of *Sphk2* mRNA is significantly increased in *Sphk1*<sup>-/-</sup> mice cornea as compared to the WT (Values are Mean ± SD; t-test: \*\*p ≤ 0.01).

## Supplementary Figure S2

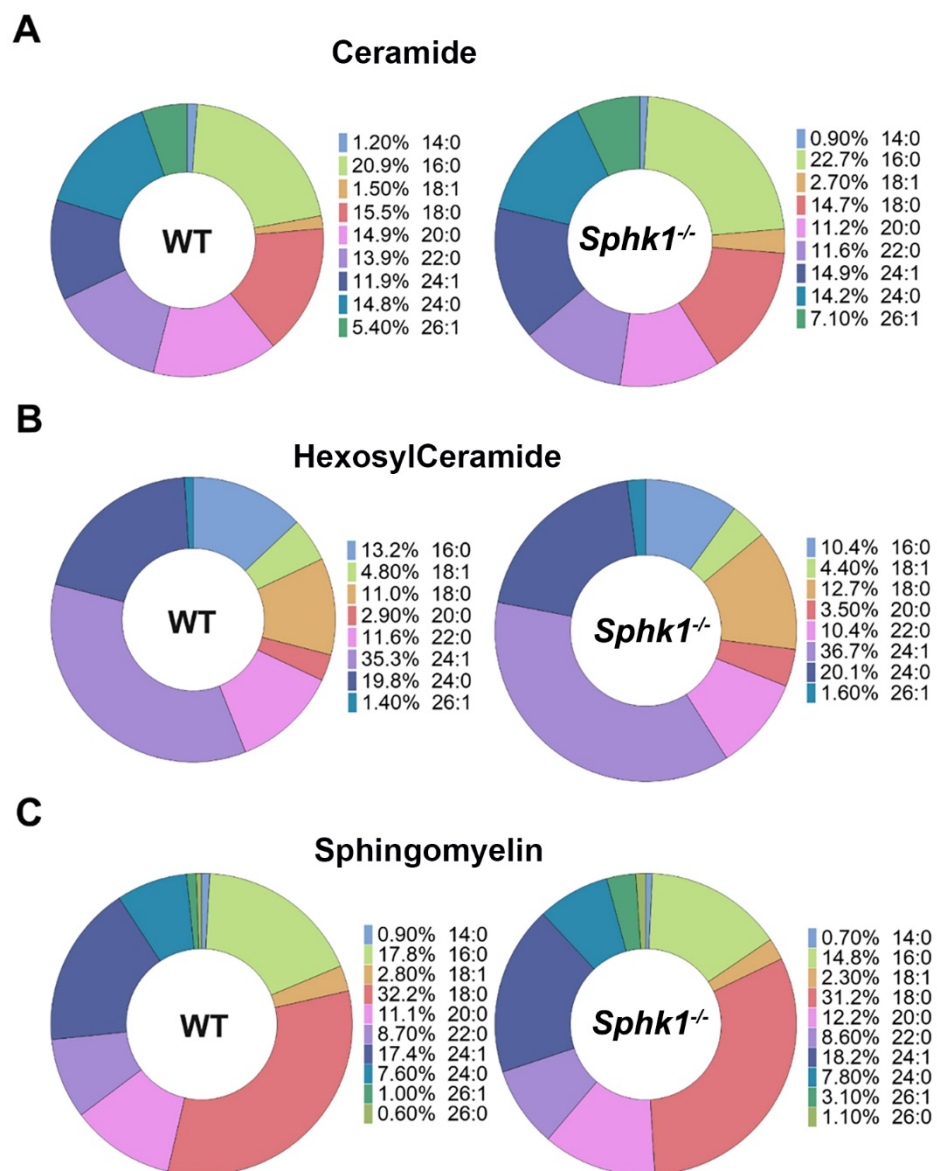

**Figure S2. Mole percent composition of sphingolipids in the cornea.** Analysis of sphingolipids from WT and *Sphk1*<sup>-/-</sup> mice cornea (n=6) showing mole percent composition of (A) ceramide, (B) HexCer and (C) sphingomyelin. (Values are mean ± SD).

## Supplementary Figure S3

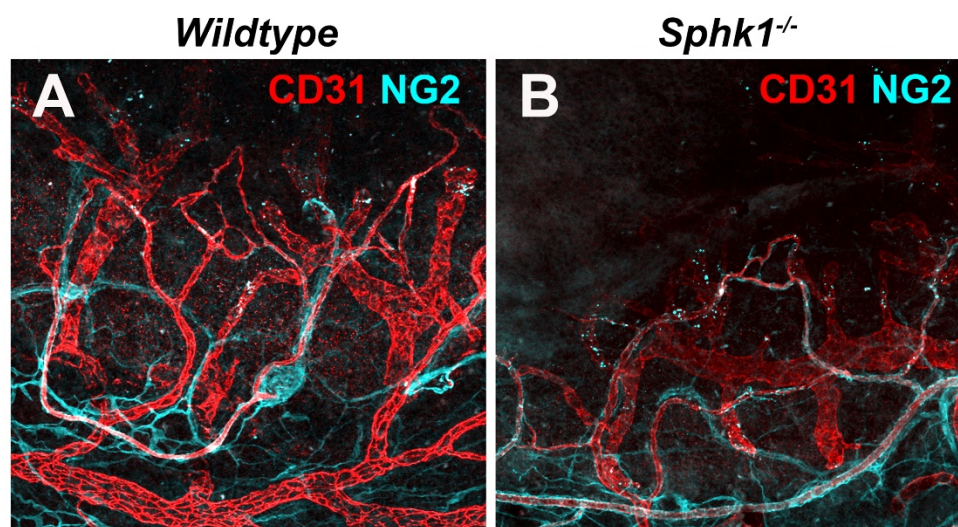

**Figure S3. Ablation of *Sphk1* does not affect pericyte migration.** Following alkali burn WT (A) and *Sphk1*<sup>-/-</sup> (B) mice corneas were collected on 7 PBD and flat mounted (n=10). Immunostaining with CD31 (red) for blood vessels and NG2 (cyan), a marker for pericytes, shows that pericytes are being recruited normally to the newly forming vessels with no difference in recruitment between WT and *Sphk1*<sup>-/-</sup> mice.

## Supplementary Figure S4

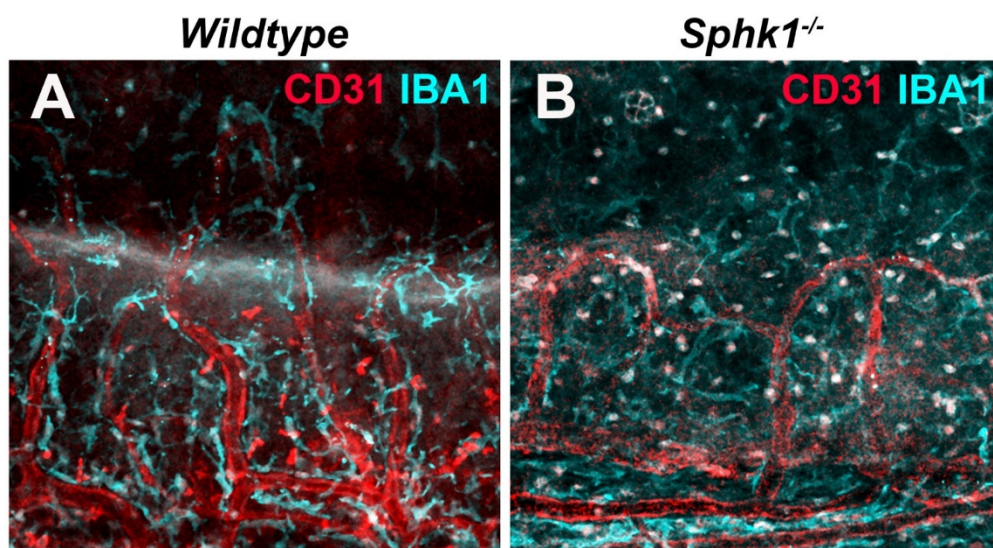

**Figure S4. Ablation of *Sphk1* does not affect macrophage egress from blood vessels.** WT (A) and *Sphk1*<sup>-/-</sup> (B) mice corneas were subjected to alkali burn (n=8). Corneas were harvested on 7 PBD, flat mounted and immuno-stained with CD31 (red) for blood vessels and IBA1 (cyan) for macrophage. Macrophage egress can be observed from vessels and no significant difference was noticed between WT and *Sphk1*<sup>-/-</sup> corneas.

## Supplementary Figure S5

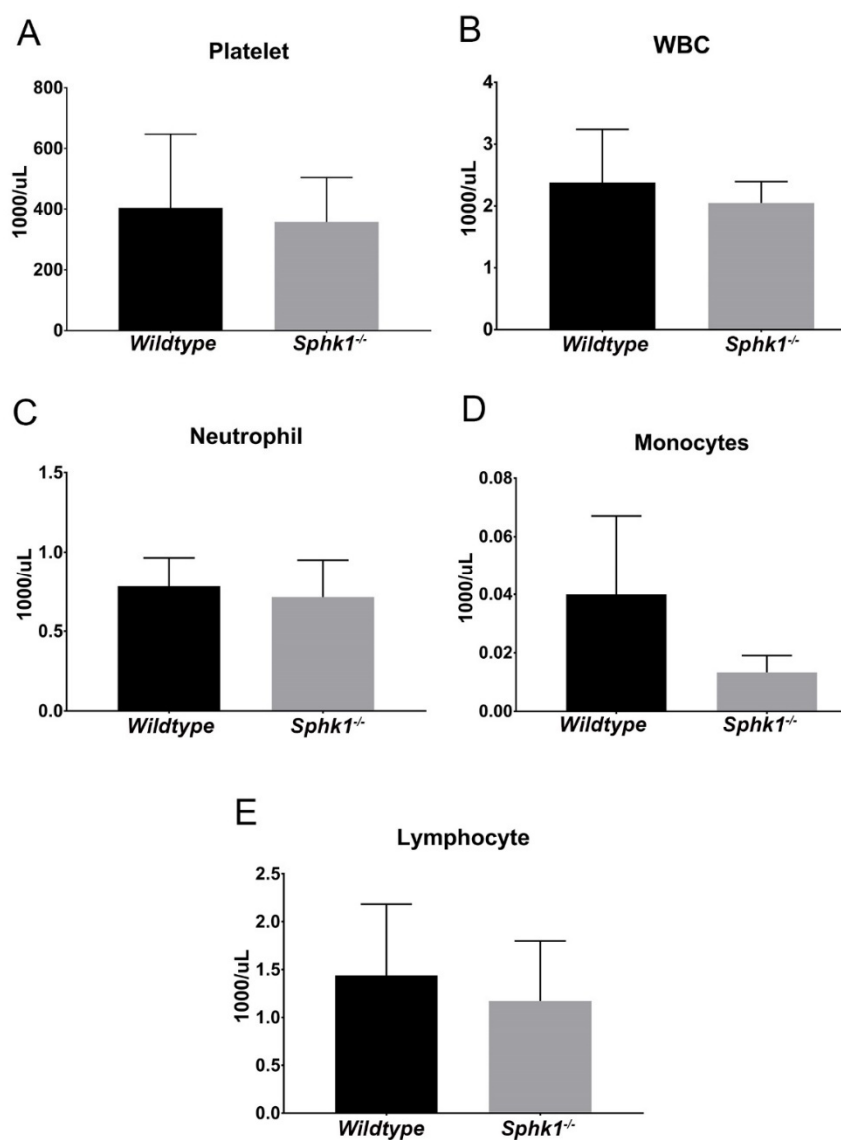

**Figure S5. Complete blood counts showed that reduced plasma S1P has no effect on major classes of immune cells.** (A) Platelets remain unaffected. (B) White blood cell levels remain unaffected even with reduced S1P. (C) Neutrophils remain unaffected. (D) Monocyte numbers show a reduction trend but is not significant. (E) Lymphocytes remain unaffected. (n=4, Values are Mean ± SD; For A, B, C, and E: two-tailed t-test,  $p \leq 0.05$ ; For D: Mann-Whitney two-tailed test,  $U=0.5$ ).
